# Supplementary material for: Postoperative Impact of Pontocerebellar Angle Surgery on the Quality of Life in Patients with Vestibular Schwannoma
Source: Audiol Res. 2022 Nov 17;12(6):635–43. doi: 10.3390/audiolres12060061 (PMC9680513; doi:10.3390/audiolres12060061)
Supplement: Supplementary file 1 [file audiolres-12-00061-s001.zip › audiolres-1991344-supplementary.pdf]

## SUPPLEMENTARY FILE

### STATISTICAL ANALYSIS, SUPPLEMENTARY TABLES AND DATA

Table S1: Subgroups based on postoperative facial dysfunction measured by HB score. Wilcoxon test was used ( $p(\alpha) < 0,05$ )

|                       | Normal or mild<br>HB I - II (n = 19) |       | Severe HB III or<br>> (n = 12) |       | W              |
|-----------------------|--------------------------------------|-------|--------------------------------|-------|----------------|
|                       | Median                               | SD    | Median                         | SD    | p ( $\alpha$ ) |
| Anxiety               | 62.5                                 | 26.44 | 59.375                         | 26.69 | n.s.           |
| Facial<br>Dysfunction | 75                                   | 24.64 | 51                             | 24.52 | 0.03*          |
| General health        | 25                                   | 31.43 | 43.75                          | 30.93 | n.s.           |
| Balance               | 50                                   | 33.14 | 50                             | 33.73 | n.s.           |
| Hearing               | 37                                   | 20.79 | 40.62                          | 20.58 | n.s.           |
| Energy                | 58.3                                 | 26.68 | 66.7                           | 26.77 | n.s.           |
| Pain                  | 75                                   | 38.14 | 47.5                           | 38.04 | 0.014*         |
| Total                 | 52.9                                 | 20.4  | 54.95                          | 20.67 | n.s.           |

\*Statistically significant after Bonferroni correction.

HB: House–Brackmann; n.s.: not significant; SD: standard deviation; W: Wilcoxon log rank test

Table S2: Subgroups based on preoperative tumor size measured by Koos classification. Wilcoxon test was used ( $p(\alpha) < 0.05$ )

|                       | Koos LOW<br>GRADE (I -II) |       | Koos HIGH<br>GRADE (III-IV) |       | W              |
|-----------------------|---------------------------|-------|-----------------------------|-------|----------------|
|                       | Median                    | SD    | Median                      | SD    | p ( $\alpha$ ) |
| Anxiety               | 62.5                      | 31.25 | 59.37                       | 25.10 | n.s.           |
| Facial<br>Dysfunction | 75                        | 29.50 | 58.3                        | 22.74 | n.s.           |
| General health        | 50                        | 24.56 | 25                          | 31.79 | n.s.           |
| Balance               | 33.33                     | 39.00 | 52.08                       | 30.28 | n.s.           |
| Hearing               | 31.25                     | 21.52 | 40.62                       | 20.23 | n.s.           |
| Energy                | 66.7                      | 30.82 | 62.5                        | 25.90 | n.s.           |
| Pain                  | 75                        | 37.73 | 75                          | 37.74 | n.s.           |
| Total                 | 59                        | 26.75 | 52.9                        | 18.02 | n.s.           |

\*Statistically significant after Bonferroni correction.

n.s., not significant; SD, standard deviation, W: Wilcoxon log rank test

Table S3: Subgroups based on postoperative complications. Wilcoxon test was used ( $p(\alpha) < 0.05$ )

|                    | No postop complications |       | Postop complications |       | KW             |
|--------------------|-------------------------|-------|----------------------|-------|----------------|
|                    | Median                  | SD    | Median               | SD    | p ( $\alpha$ ) |
| Anxiety            | 75                      | 28.26 | 56.25                | 20.35 | n.s.           |
| Facial Dysfunction | 70.85                   | 27.25 | 58.3                 | 17.20 | n.s.           |
| General health     | 50                      | 30.77 | 25                   | 28.64 | n.s.           |
| Balance            | 54.17                   | 34.62 | 33.33                | 28.17 | n.s.           |
| Hearing            | 43.75                   | 20.77 | 25                   | 15.15 | n.s.           |
| Energy             | 66.7                    | 27.70 | 50                   | 24.72 | n.s.           |
| Pain               | 75                      | 37.74 | 75                   | 37.73 | n.s.           |
| Total              | 59.10                   | 21.32 | 42.3                 | 17.07 | n.s.           |

W: Wilcoxon Log-Rank test

\*Statistically significant after Bonferroni correction.

n.s., not significant; SD, standard deviation.

### PREOPERATIVE HEARING LEVEL

Patients were assigned into four groups according to their preoperative hearing level on the ear where tumor was located, according to the classification system of the Committee on Hearing and Equilibrium of the American Academy of Otolaryngology-Head and Neck surgery (AAO-HNS) 1995: group A ( $n = 4$ ) *PTA (Pure Tone Thresholds)  $\leq 30$  dB and SDS (Speech discrimination %)  $\geq 70\%$* ; group B ( $n = 5$ ) *PTA  $> 30$  dB,  $\leq 50$  dB and SDS  $\geq 50\%$* , group C ( $n = 8$ ) *PTA  $> 50$  dB and SDS  $\geq 50\%$* , group D ( $n = 14$ ) *PTA any level and SDS  $< 50\%$* . There was not a specific trend for the domain of “hearing” into different groups, and even Kruskal-Wallis test showed no significative differences for every group.

### AUDITORY GROUP KRUSKAL-WALLIS TEST

|                |          |
|----------------|----------|
| PANQOL TOT     | 0.754 ns |
| BALANCE        | 0.231 ns |
| HEARING        | 0.731 ns |
| ANXIETY        | 0.512 ns |
| FACIAL DYS     | 0.771 ns |
| ENERGY         | 0.780 ns |
| PAIN           | 0.754 ns |
| GENERAL HEALTH | 0.350 ns |
